# Supplementary material
Source: Elsevier journal article supplement (https://www.sciencedirect.com/science/article/pii/S1576988720300406)
Supplement: mmc1 [file S1576988720300406:mmc1.pdf]

Nuria Torner, MSc PhD  
Editor in Chief  
Vacunas

Reviewers acomments:

*Being that your submission is an editorial letter , this is published without abstracts and keywords. Could you please delete them and resubmit by simply deleting these elements. I also suggest you change the title to make it more accurate: Simultaneous occurrence of seasonal influenza virus and SARS CoV-2 strains What we do need is the title in Spanish, which if you want, I can suggest: Circulación simultánea de virus de la gripe estacional y cepas SARS CoV-2*

*I have some comments and corrections that will be mailed to you as an attach for your consideration.*

**Author reply:**

- In agreement with the reviewers, we have changed the title and also new Spanish titles were also inserted in revised manuscript.
- With respect to the editor s comment, we have discarded the abstract and key words in revised version submitted to the journal.
- Considering the query about which COVID positive cases, we added the words PCR in the text for more clarifications. We hope it helps to the text to be more readable.
- With thanks to constructive comment raise by the reviewers/editor, we have added two new references to meet the approval by reviewers on the case of CFR in Influenza and COVID-19.
- We made all corrections attached in uploaded file by the editorial office.
- In agreement with the nice comment to clarify which age groups to be candidate for receiving he vaccines in this autumn, we rewrite the sentence to meet the approval by reviewer. However, we think that the text is much more improved and more readable for people.

In end, we kindly appreciate the editorial office for their positive input in our submission,

We look forward to have your input in our revised manuscript,

Regards,

Amin Talebi Bezmin Abadi

[Amin.talebi@modares.ac.ir](mailto:Amin.talebi@modares.ac.ir)

On behalf of all authors,
